# Supplementary material for: Surgical management of anastomotic leakage related to ovarian cancer surgery: a narrative review
Source: Front Surg. 2024 Sep 11;11:1434730. doi: 10.3389/fsurg.2024.1434730 (PMC11422216; doi:10.3389/fsurg.2024.1434730)
Supplement: Supplementary file 1 [file Table1.xlsx]

## Sheet: Foglio1
ID Study	Study design	Number of patients; N = patients	Radical surgery (%)	Number of patients with anastomosis; N = patients	AL rate (%)	Relaparotomy rate of patients with AL; N = patients	Risk factors associated with AL	Calculator of AL rate	Factors associated with the use of diverting ileostomy
Gockley AA, Fiascone S; 2019 (3)	Retrospective cohort study from two large academic institutions	N=554 total patients with advanced OC, of whom 139 had bowel surgery during either PDS or IDS	Complete cytoreduction: 276/554 (49,8%), residual disease <1cm: 218/554 (39,35%)	N= 25/139 (17,98%). Final patient ostomy rate= 30/139 (21,58%)	3.6% (5/139), all of which were in the group that underwent primary surgery	N= 4/139 (2.8%)	Not reported	Not reported	Longer mean operative time (p<0.001), combined small and large bowel resection (p<0.001). Multivariate analysis showed that only a high Aletti score was associated with an increased risk of ostomy formation (p=0.003)
Valenti G, Vitagliano A; 2022 (7)	Systematic review and meta-analysis	The 35 articles included a total of 5178 patients who received primary anastomosis	//	//	//	//	Preoperative albumin level <3 gr/dl: ODDS ratio= 5,29 [1.51,18.59], p=0,009; multiple bowel resections: ODDS ratio= 1.71 [1.05,2.77]; p=0,03 and primary cytoreductive surgery (PDS): ODDS ratio= 4.40 [1.16,16.66], p=0,03	Not reported	Not reported
Grimm C, Harter P; 2017 (8)	retrospective cohort study	N0= 800 primary advanced HGSOC FIGO III-IV total cohort; N1= 518 HGSOC who underwent at least one bowel resection during primary or interval debulking surgery	58.6% (469/800): complete citoreduction	N=518; total anastomosis number: 689	N=4.5% (36/800), N1=6.9% (36/518), N2=5.2% (36/689)	//	Not identified pre and intraoperative risk factors for AL	Not reported	Not reported
Kim JH, Han WH; 2023 (9)	Single-center retrospective, observational cohort study	N=770	Complete cytoreduction: 71.7%, residual disease <1cm: 27.1%	N= 62/770 (8.1%)	4.2% (32/770)	N=17 patients (53.1%)	Multivariable analysis: diabetes (p=0.031), concomitant distal pancreatectomy (p=0.015), macroscopic residual tumour (p=0<001) and anastomotic level from the anal verge less than 10 cm (p=0.001).	A nomogram was developed based on multivariable analysis. Each risk factor is scored on a scale from 0 to 100, and the total score ranges from 0 to 355. Available at https://doi. org/10.1186/s13048-023-01153-x	Not reported
Kalogera E, Nitschmann CC; 2017 (11)	Prospective cohort study applied in the Division of Gynecologic Surgery, Mayo Clinic, Rochester.	N=77 patients	Complete cytoreduction: 59.7% (46/77), residual disease <1cm: 29 (37.7)	N= 27/77 (35.1%)	1.3% (1/77) ; 24/309 (7.8%) in the historical cohort (p=0.039)	Major 30-day post-operative complications: 5/27 (18.5%) ostomy group, 9/50 (18%) not ostomy group	Not reported	Not reported	Rectosigmoid resection with additional bowel resection (33.3%), anastomosis ≤6 cm from anal verge (26.3%), surgeon's intraoperative assessment of need for diversion (22.2%), and failed leak test (18.6%); preoperative albumin ≤3.0 g/dL (7.7%), previous pelvic irradiation (7.4%), pelvis contamination with stool (7.4%)
Lago V, Fotopoulou C; 2019 (12)		N=695 total patients and 457 included in the final multivariable logistic regression model	//	N=133/695 (19.13%)	6,61% (46/695)	//	Univariate analysis: age, BMI, insulin dependent diabetes, neoadjuvant CHT, previous use of bevacizumab (in the last 2 months), serum albumin level, operating time, intraoperative transfusion, distance from the anal verge, ileostomy, ghost ileostomy, stapled or hand sewn anastomosis, smal bowel resection (>1), large&small bowel resection. Multivariate analysis: age at surgery (p = 0.005), serum a…	The APP risk model score has been developed to determine the risk of AL in individual patients. It is based on the logistic regression formula. https://oaa.app.link/LrSzCkpZoT?_height=1050&_width=1680	//
Costantini B, Vargiu V; 2022 (13)	Single-center retrospective, observational cohort study	N=515	Complete cytoreduction: 79.6%; residual disease<1cm: 16.3%	N= 230/515 (44.7%)	2.9% (15/515)	N=12/15 patients (80%)	Univariate analysis: Age at surgery >60 years (p = 0.043), BMI<18 (p<0.001), preoperative albumin value<30 mg/dL (p = 0.003), section at the origin of the inferior mesenteric artery (IMA) (p< 0.001), hypogastric vessels section (p< 0.001), distance of the anastomosis from the anal verge <10 cm (p< 0.001), intraoperative transfusions (p = 0.015), postoperative anemia (p = 0.012), pelvic lymph node…	Not reported	Multivariate analysis: more than one bowel resection (p<0.001), medium–low anastomosis at less than 10 cm from the anal verge (p = 0.001), operative time longer than 300 min (p = 0.040), and need for intraoperative transfusions (p = 0.037)
Sánchez-Iglesias JL, Gómez-Hidalgo NR; 2023 (14)	Cohort study case-control	N=114 patients. Bowel preparation status: MBP pre-ERAS (n=39) versus NMBP post-ERAS (n=75)	Complete cytoreduction: MBP 28 (71.8) vs NMBP 65 (86.7), all 93 (81.6). Residual disease <1cm: MBP 9 (23.1) vs NMBP 10 (13.3), all 19 (16.7)	All 14 (12.3), MBP 3 (7.8), NMPB 11 (14.7)	Complication (colorectal leakage, small bowel leakage, abscess, fistula): all patients 14 (12.3), MBP 5 (12.8) vs NMBP 9 (12.0).	Reintervention rate in all patients: 17 (14.9), in NMBP group 13 (17.3) vs in MBP 4 (10.3). reintervation rate because of AL: all patients 7 (6.1), MBP 6 (8.0) vs NMBP 1 (2.6).	One patient (2.6%) in the MBP group, and 4 patients (5.3%) in the NMBP group experienced an anastomotic leakage (p = 0.11), with surgery needed to manage the leakage. No significantly higher risk of overall or infectious morbidity in the NMBP group compared with the MBP group	Not reported
Bartl T, Schwameis R; 2018 (15)	Retrospective cohort study	N= 350 patients cytoreduction for FIGO stage IIB–IV OC	Not reported	N= 192 patients (54.9%) patients undergoing colorectal resection	4.7% for patients with advanced EOC undergoing cytoreductive surgery with at least 1 bowel resection; 1.9% for patients with isolated rectosigmoid resection	Not reported	Univariate analysis: the number of anastomoses per operation (P = 0.04). Multivariable analysis: rectosigmoid resection with additional colon resection vs. isolated rectosigmoid resection (P = 0.046; odds ratio: 7.23).	Not reported	Not reported
Son JH, Kim J; 2019 (16)	Retrospective cohort study	N=163 patients with ovarian cancer undergoing rectosigmoid colon resection. Of these patients, N1=87 (53.4%) underwent close rectal dissection and N2=76 (46.6%) underwent total mesorectal excision as the posterior rectal dissection technique	No gross residual disease: 133 patients (81.6%); gross residual disease <1 cm: 29 patients (17.8%), gross residual disease >1 cm: 1 patient (0.6%)	117 patients (71.8%): low anterior resection; 20 patients (12.3%): subtotal colectomy; 26 (15.9%): two-segment resection	5.3%	Not reported	The rate of AL was higher in the TME group (4 of 76, 5.3%) than in the CRD group (0 of 87, 0%) (p=0.045). TME technique was not an independent risk factor for AL (p=0.085).	Not reported	Not reported
Lago V, Sanchez-Migallón A; 2019 (19)	retrospective cohort study	N= 145 patients underwent colorectal resection during cytoreduction for FIGO stage II–IV OC	Not reported	N=133 total. N1=121 with a modified posterior pelvic exenteration(91%); N2=12 (9%) with a recto-sigmoid resection. The approach after anastomosis was wait-and-see in 72 patients (54.1%), diverting ileostomy in 19 patients (14.4%), and ghost ileostomy in 42 patients (31.5%).	AL rate between the three groups (5.6% vs 5.3% vs 4.8%; p=0.98).	A laparotomy was needed in all patients of the wait-and-see group for stoma formation (75% end colostomy), but no laparotomy was required for stoma formation in the ghost ileostomy group	Wait and watch is not a risk factor for AL: Univariate analysis showed no difference in AL risk factors that could explain the anastomotic leak rate between the three approaches. There were differences in complications related to AL: two patients died from AL in the wait-and-see group and none in the diversion or ghost ileostomy groups	Not reported	Not reported
Lago V, Fotopoulou C; 2020 (20)	Multicentre, retrospective cohort study	N=695 total patients	//	N=133/695 (19.13%)	The rate of AL was 13.9% (15/108) versus 8.9% (31/349) in the ileostomy versus no ileostomy group respectively (p = 0,184)	//	Univariate analysis: age, BMI, insulin dependent diabetes, neoadjuvant CHT, previous use of bevacizumab (in the last 2 months), serum albumin level, operating time, intraoperative transfusion, distance from the anal verge, ileostomy, ghost ileostomy, stapled or hand sewn anastomosis, smal bowel resection (>1), large&small bowel resection. Multivariate analysis: age at surgery (p = 0.005), serum a…	The APP risk model score has been developed to determine the risk of AL in individual patients. It is based on the logistic regression formula. https://oaa.app.link/LrSzCkpZoT?_height=1050&_width=1680	Univariate analysis: setting of a high volume center [p <0.001]; previous neoadjuvant chemotherapy [p=0.039]; previous treatment with bevacizumab [ p<0.001]; additional bowel resections [p<0.001]; extended operating time [p<0.001]; intraoperative red blood transfusion [p<0.001] and HIPEC use [p=0.001]. Multivariate analysis: previous treatment with bevacizumab [p=0.01]; additional bowel resection…
Navarro Santana B, Garcia Torralba E; 2022 (22)	Systematic review and meta-analysis	N=2.719 patients with small and great bowel resections for OC, N=475 total patients with ostomy performed	Not reported	Not reported	N= 31 (6.5%) in the ostomy group and N=190 (8.5%) in the non-ostomy group.	N=8 (3.1%) ostomy patients and N=101 (8.4%) in non-ostomy patients	AL rate between ostomy and no-ostomy grounps: 6.5% (n=31) in the ostomy group and 8.5% (n=190) in the non-ostomy group; pooled OR for studies was 1.01 (95% CI=0.60–1.70; p=0.980)	Not reported	Not reported
